# Supplementary material for: Pattern of Severity of Road Traffic Injuries Among Pedestrians in Low- and Middle-Income Countries: A Systematic Review
Source: bioRxiv or medRxiv preprint supplement (doi:10.1101/2021.02.13.21251689), 2021-02-16
Supplement: Supplementary file [file media-3.pdf]

## Additional file – 2: World Bank list of low and middle-income countries

|                             |                              |                          |                                   |
|-----------------------------|------------------------------|--------------------------|-----------------------------------|
| Afghanistan                 | Dominica                     | Liberia                  | Sao Tome and Principe             |
| Albania                     | Dominican Republic           | Libya                    | Senegal                           |
| Algeria                     | Ecuador                      | Macedonia, FYR           | Serbia                            |
| American Samoa              | Egypt, Arab Rep.             | Madagascar               | Sierra Leone                      |
| Angola                      | El Salvador                  | Malawi                   | Solomon Islands                   |
| Argentina                   | Equatorial Guinea            | Malaysia                 | Somalia                           |
| Armenia                     | Eritrea                      | Maldives                 | South Africa                      |
| Azerbaijan                  | Ethiopia                     | Mali                     | South Sudan                       |
| Bangladesh                  | Fiji                         | Marshall Islands         | Sri Lanka                         |
| Belarus                     | Gabon                        | Mauritania               | St. Lucia                         |
|                             |                              |                          | St. Vincent and the<br>Grenadines |
| Belize                      | Gambia, The                  | Mauritius                | Sudan                             |
| Benin                       | Georgia                      | Mexico                   |                                   |
|                             |                              | Micronesia, Fed.<br>Sts. | Suriname                          |
| Bhutan                      | Ghana                        | Moldova                  | Swaziland                         |
| Bolivia                     | Grenada                      |                          |                                   |
| Bosnia and<br>Herzegovina   | Guatemala                    | Mongolia                 | Syrian Arab Republic              |
| Botswana                    | Guinea                       | Montenegro               | Tajikistan                        |
| Brazil                      | Guinea-Bissau                | Morocco                  | Tanzania                          |
| Bulgaria                    | Guyana                       | Mozambique               | Thailand                          |
| Burkina Faso                | Haiti                        | Myanmar                  | Timor-Leste                       |
| Burundi                     | Honduras                     | Namibia                  | Togo                              |
| Cabo Verde                  | India                        | Nepal                    | Tonga                             |
| Cambodia                    | Indonesia                    | Nicaragua                | Tunisia                           |
| Cameroon                    | Iran, Islamic Rep.           | Niger                    | Turkey                            |
| Central African<br>Republic | Iraq                         | Nigeria                  | Turkmenistan                      |
| Chad                        | Jamaica                      | Pakistan                 | Tuvalu                            |
| China                       | Jordan                       | Palau                    | Uganda                            |
| Colombia                    | Kazakhstan                   | Panama                   | Ukraine                           |
| Comoros                     | Kenya                        | Papua New Guinea         | Uzbekistan                        |
| Congo, Dem. Rep.            | Kiribati                     | Paraguay                 | Vanuatu                           |
|                             | Korea, Dem. People's<br>Rep. | Peru                     | Venezuela, RB                     |
| Congo, Rep.                 | Kosovo                       | Philippines              | Vietnam                           |
| Costa Rica                  | Kyrgyz Republic              | Romania                  | West Bank and Gaza                |
| Cote d'Ivoire               | Lao PDR                      | Russian Federation       | Yemen, Rep.                       |
| Cuba                        | Lebanon                      | Rwanda                   | Zambia                            |
| Djibouti                    | Lesotho                      | Samoa                    | Zimbabwe                          |

\*Accessed in December 2017 from <https://data.worldbank.org/income-level/low-and-middle-income>
