# Supplementary material for: Pattern of Severity of Road Traffic Injuries Among Pedestrians in Low- and Middle-Income Countries: A Systematic Review
Source: bioRxiv or medRxiv preprint supplement (doi:10.1101/2021.02.13.21251689), 2021-02-16
Supplement: Supplementary file [file media-4.pdf]

**Additional file – 5: List of articles excluded after full-text review**

| <b>Sr No</b> | <b>Author (Year of Publication)</b> | <b>Title</b>                                                                                                                                                 | <b>Reason for exclusion</b>                                                                                    |
|--------------|-------------------------------------|--------------------------------------------------------------------------------------------------------------------------------------------------------------|----------------------------------------------------------------------------------------------------------------|
| 1            | Joseph et al. (2014)                | Epidemiological profile of facial trauma treated at father muller hospital, Thumbay                                                                          | Data on pedestrian injuries was not available.                                                                 |
| 2            | Keum (2016)                         | Analysis of road traffic crashes and injury severity of pedestrian victims in the Gambia                                                                     | Specific injury severity scoring system was not used.                                                          |
| 3            | Yang et al. (2005)                  | Correlation of different impact conditions to the injury severity of pedestrians in real world accidents                                                     | Data on pedestrian injuries was not available.                                                                 |
| 4            | Porchia et al. (2014)               | Effectiveness of two interventions in preventing traffic accidents: a systematic review                                                                      | Reference list was screened for any relevant and missing articles. No new article was found.                   |
| 5.           | Reith et al. (2015)                 | Injury pattern, outcome, and characteristics of severely injured pedestrian                                                                                  | Study context was not relevant to LMICs. This information was not available in the title and abstract section. |
| 6.           | Lozano et al. (2012)                | Global and regional mortality from 235 causes of death for 20 age groups in 1990 and 2010: a systematic analysis for the Global Burden of Disease Study 2010 | Reference list was screened for any relevant and missing articles.                                             |
| 7.           | Lateef M (2011)                     | Spatial patterns monitoring of road traffic injuries in Karachi metropolis                                                                                   | Specific injury severity scoring system was not used.                                                          |
| 8.           | Olukoga A (2008)                    | Pattern of road traffic accidents in Durban municipality, South Africa                                                                                       | Specific injury severity scoring system was not used.                                                          |
| 9.           | Obeng K (2007)                      | Injury Severity, Vehicle Safety Features, and Intersection Crashes                                                                                           | Study context was not relevant to LMICs. This information was not available in the title and abstract section. |
| 10.          | Moe H (2008)                        | Road traffic injuries among patients who attended the accident and emergency unit of the university of Malaya Medical Centre, Kuala Lumpur                   | Specific injury severity scoring system was not used.                                                          |
| 11.          | Adeloye D et al. (2016)             | The burden of road traffic crashes, injuries, and deaths in Africa: a systematic review and meta-analysis                                                    | Reference list was screened for any relevant and missing articles.                                             |

|     |                               |                                                                                                                                                                                                               |                                                                    |
|-----|-------------------------------|---------------------------------------------------------------------------------------------------------------------------------------------------------------------------------------------------------------|--------------------------------------------------------------------|
| 12. | Mooney S J et al. (2016)      | Use of Google Street View to Assess Environmental Contributions to Pedestrian Injury                                                                                                                          | Specific injury severity scoring system was not used.              |
| 13. | Lutge E et al. (2016)         | Injury Research: Investigators at University of KwaZulu-Natal Report Findings in Injury Research (A hospital-based surveillance system to assess the burden of trauma in KwaZulu-Natal Province South Africa) | Specific injury severity scoring system was not used.              |
| 14. | Zhou M et al. (2016)          | Cause-specific mortality for 240 causes in China during 1990-2013: a systematic subnational analysis for the Global Burden of Disease Study 2013                                                              | Reference list was screened for any relevant and missing articles. |
| 15. | Richmond S A et al. (2016)    | Trends in unintentional injury mortality in Canadian children 1950-2009 and association with selected population-level interventions                                                                          | Data on pedestrian injuries was not available.                     |
| 16. | Hyder A et al. (2016)         | The Road Traffic Injuries Research Network: a decade of research capacity strengthening in low- and middle-income countries                                                                                   | Data on pedestrian injuries was not available.                     |
| 17. | Leidman E et al. (2016)       | Road traffic fatalities in selected governorates of Iraq from 2010 to 2013: prospective surveillance                                                                                                          | Specific injury severity scoring system was not used.              |
| 18. | McClure R et al. (2015)       | Contextual Determinants of Childhood Injury: A Systematic Review of Studies with Multilevel Analytic Methods                                                                                                  | Reference list was screened for any relevant and missing articles. |
| 19. | Dharmaratne S D et al. (2015) | Road traffic crashes, injury and fatality trends in Sri Lanka: 1938-2013                                                                                                                                      | Specific injury severity scoring system was not used.              |
| 20. | Matzopoulos R et al. (2015)   | Injury-related mortality in South Africa: a retrospective descriptive study of post-mortem investigations                                                                                                     | Specific injury severity scoring system was not used.              |
| 21. | Onywera V O et al. (2013)     | Road accidents: a third burden of 'disease' in sub-Saharan Africa                                                                                                                                             | Data on pedestrian injuries was not available.                     |
| 22. | Verzosa N et al. (2016)       | Severity of road crashes involving pedestrians in Metro Manila, Philippines                                                                                                                                   | Specific injury severity scoring system was not used.              |

|     |                              |                                                                                                                    |                                                       |
|-----|------------------------------|--------------------------------------------------------------------------------------------------------------------|-------------------------------------------------------|
| 23. | Huang K et al. (2015)        | The relationship between injury severity and individual characteristics: a survey in Southern China                | Specific injury severity scoring system was not used. |
| 24. | Qiu J et al. (2016)          | Analysis of road traffic injuries by road user type in Chongqing, China                                            | Specific injury severity scoring system was not used. |
| 25. | Lutge E et al. (2015)        | A hospital-based surveillance system to assess the burden of trauma in KwaZulu-Natal Province South Africa         | Specific injury severity scoring system was not used. |
| 26. | McGreevy J et al. (2014)     | Road traffic injuries in Yaounde, Cameroon: A hospital-based pilot surveillance study                              | Specific injury severity scoring system was not used. |
| 27. | Bumbasirevic M et al. (2014) | Severe road traffic injuries and youth: a 4-year analysis for the city of Belgrade                                 | Data on pedestrian injuries was not available.        |
| 28. | Kamruzzaman M et al. (2014)  | Analysis of Traffic Injury Severity in Dhaka, Bangladesh                                                           | Data on pedestrian injuries was not available.        |
| 29. | Parkinson F et al. (2013)    | Road traffic crashes in South Africa: The burden of injury to a regional trauma centre                             | Specific injury severity scoring system was not used. |
| 30. | Parkinson F et al. (2013)    | Patterns of injury seen in road crash victims in a South African trauma centre                                     | Specific injury severity scoring system was not used. |
| 31. | Minca D G et al. (2013)      | Profile of persons involved in traffic accidents in Romania                                                        | Data on pedestrian injuries was not available.        |
| 32. | Zhao H et al. (2013)         | An Investigation on the Head Injuries of Adult Pedestrians by Passenger Cars in China                              | Specific injury severity scoring system was not used. |
| 33. | Velloso et al. (2012)        | On-the-spot study of pedestrian crashes on Brazilian Federal District rural highways crossing urban areas          | Specific injury severity scoring system was not used. |
| 34. | Pernica J F et al. (2011)    | Risk factors predisposing to pedestrian road traffic injury in children living in Lima, Peru: a case-control study | Specific injury severity scoring system was not used. |
| 35. | Zimmerman K et al. (2011)    | Road traffic injury incidence and crash characteristics in Dar es Salaam: A population-based study                 | Data on pedestrian injuries was not available.        |
| 36. | Guerrero A et al. (2010)     | Paediatric road traffic injuries in urban Ghana: a population-based study                                          | Specific injury severity scoring system was not used. |
| 37. | Malta D C et al. (2011)      | Analysis of the occurrence of traffic injuries and related factors according to the                                | Specific injury severity scoring system was not used. |

|     |                               |                                                                                                                                  |                                                       |
|-----|-------------------------------|----------------------------------------------------------------------------------------------------------------------------------|-------------------------------------------------------|
|     |                               | National Household Sample Survey (PNAD) - Brazil, 2008                                                                           |                                                       |
| 38. | Dandona R et al. (2011)       | Road use pattern and risk factors for non-fatal road traffic injuries among children in urban India                              | Specific injury severity scoring system was not used. |
| 39. | Li F et al. (2010)            | A study of head brain injuries in car-to-pedestrian crashes with reconstructions using in-depth accident data in China           | Specific injury severity scoring system was not used. |
| 40. | Zhao H et al. (2010)          | Investigation of 184 passenger car-pedestrian accidents                                                                          | Specific injury severity scoring system was not used. |
| 41. | Bhalla K et al. (2009)        | Building national estimates of the burden of road traffic injuries in developing countries from all available data sources: Iran | Data on pedestrian injuries was not available.        |
| 42. | Dandona R et al (2008)        | Incidence and burden of road traffic injuries in urban India                                                                     | Specific injury severity scoring system was not used. |
| 43. | Adesunkanmi A R et al. (2000) | Road traffic accidents to African children: assessment of severity using the Injury Severity Score (ISS)                         | Data on pedestrian injuries was not available.        |
| 44. | Al-Omari B H et al. (2013)    | Analysis of Pedestrian Accidents in Irbid City, Jordan                                                                           | Specific injury severity scoring system was not used. |
| 45. | Nie J et al. (2010)           | A Study on Pedestrian Injuries based on Minivan and Sedan Real-World Accidents                                                   | Specific injury severity scoring system was not used. |
| 46. | Siram S M et al. (2010)       | Does the Pattern of Injury in Elderly Pedestrian Trauma Mirror That of The Younger Pedestrian?                                   | Specific injury severity scoring system was not used. |
| 47. | Derry J D et al. (2010)       | Pedestrians Injury Patterns in Ghana                                                                                             | Specific injury severity scoring system was not used. |
