# Supplementary material for: Pattern of Severity of Road Traffic Injuries Among Pedestrians in Low- and Middle-Income Countries: A Systematic Review
Source: bioRxiv or medRxiv preprint supplement (doi:10.1101/2021.02.13.21251689), 2021-02-16
Supplement: Supplementary file [file media-6.pdf]

**Additional File 6: Summary of studies reported severity pattern of road traffic injuries among pedestrians in LMICs**

| <b>Authors-<br/>Year of<br/>Publication</b> | <b>Study location,<br/>study setting and<br/>study design,<br/>sampling method</b>                       | <b>Severity<br/>scale</b> | <b>Participants<br/>characteristics</b><br>(type of RTIs;<br>sample size; sex<br>and distribution)             | <b>Salient features</b>                                                                                                                                                                                                                                                                                                                                                                                                                                                                                                                                                                                                                                                                                            |
|---------------------------------------------|----------------------------------------------------------------------------------------------------------|---------------------------|----------------------------------------------------------------------------------------------------------------|--------------------------------------------------------------------------------------------------------------------------------------------------------------------------------------------------------------------------------------------------------------------------------------------------------------------------------------------------------------------------------------------------------------------------------------------------------------------------------------------------------------------------------------------------------------------------------------------------------------------------------------------------------------------------------------------------------------------|
| <b>NieJin et al-<br/>2010</b>               | China;<br>population-based<br>cross-sectional<br>study                                                   | AIS                       | Crashes with car<br>and mini vans (79<br>sedans; 31<br>minivans)<br><br>Sample size: 110<br><br>All age groups | <ol style="list-style-type: none"> <li>1. Severe injuries (AIS 3+) due to crash with sedans were 35% and due to minivans were 50.5%.</li> <li>2. Minivan poses a greater risk to the pedestrian than sedan at the same impact speed.</li> <li>3. A significant correlation between the impact speed and severity of pedestrian injuries was documented. There is a significant relationship between pedestrian head injuries (AIS 3+) and injury parameters (head injury cases, head linear acceleration, head angle acceleration, angle velocity).</li> </ol>                                                                                                                                                     |
| <b>Zhao et al-<br/>2013</b>                 | Beijing, Shanxi<br>Province, and<br>Chongqing,<br>China:<br>population-based<br>cross-sectional<br>study | AIS                       | Crashes with car<br><br>Sample size: 285<br><br>Aged 16 years<br>and above                                     | <ol style="list-style-type: none"> <li>1. 10.9% (31) were aged 16-25 years, 31.6% (90) were aged 26-45 years, 31.2% (89) aged 46-60 years, and 26.3% (75) were aged 60 years and above.</li> <li>2. Based on AIS for head injuries, 38% had AIS 3-4, 21% had AIS 1-2, and 19% had AIS 5-6.</li> <li>3. Crossing the road was a major cause responsible for 78% (222) injuries, followed by walking along the road 17% (48), and standing still 5% (15).</li> <li>4. A higher pedestrian fatality risk was associated with age over 46 years, impact speed over 40 km/h, and a higher likelihood of the victim's head striking the windscreen frame/A-pillar and of the victim sustaining a head injury.</li> </ol> |

| Authors-<br>Year of<br>Publication | Study location,<br>study setting and<br>study design,<br>sampling method                                                      | Severity<br>scale | Participants<br>characteristics<br>(type of RTIs;<br>sample size; sex<br>and distribution)                                 | Salient features                                                                                                                                                                                                                                                                                                                                                                                                                                                                                                                                                                                                                                                                                                                                                                                                                                                                                                                                                                       |
|------------------------------------|-------------------------------------------------------------------------------------------------------------------------------|-------------------|----------------------------------------------------------------------------------------------------------------------------|----------------------------------------------------------------------------------------------------------------------------------------------------------------------------------------------------------------------------------------------------------------------------------------------------------------------------------------------------------------------------------------------------------------------------------------------------------------------------------------------------------------------------------------------------------------------------------------------------------------------------------------------------------------------------------------------------------------------------------------------------------------------------------------------------------------------------------------------------------------------------------------------------------------------------------------------------------------------------------------|
| <b>NieJin et al-<br/>2010</b>      | China;<br>population-based<br>cross-sectional<br>study                                                                        | AIS               | Crashes with car<br>and mini vans (79<br>sedans; 31<br>minivans)<br><br>Sample size: 110<br><br>All age groups             | <ol style="list-style-type: none"> <li>1. Severe injuries (AIS 3+) due to crash with sedans were 35% and due to minivans were 50.5%.</li> <li>2. Minivan poses a greater risk to the pedestrian than sedan at the same impact speed.</li> <li>3. A significant correlation between the impact speed and severity of pedestrian injuries was documented. There is a significant relationship between pedestrian head injuries (AIS 3+) and injury parameters (head injury cases, head linear acceleration, head angle acceleration, angle velocity).</li> </ol>                                                                                                                                                                                                                                                                                                                                                                                                                         |
| <b>Aladelusi et<br/>al - 2014</b>  | Ibadan, Nigeria:<br>hospital-based<br>cross-sectional<br>study, prospective<br>recruitment of all<br>eligible<br>participants | MFISS             | RTIs involving<br>maxillofacial<br>injuries<br><br>Sample size: 46<br>(males 52% and<br>females 48%)<br><br>All age groups | <ol style="list-style-type: none"> <li>1. 22.9% participants were pedestrians which are predominantly in the age group 11-20 years (21%), followed by 0-10 years and 21-30 years and 31-40 years (17%, each). After that, it has decreased significantly.</li> <li>2. Majority of RTI victims (65.2%) were hit by a car or minibus, followed by motorcycles (30.4%), and trucks (4.4%).</li> <li>3. The most severe MFISS was observed in the age group 21-30 years, while the least severe injury observed was in the 71 – 80 years age group.</li> <li>4. The most severe maxillofacial injury was seen in the victim of car/minibus pedestrian crashes 46% (21); 17 per cent (8) had a fatal outcome.</li> <li>5. The median MFISS score of victims of car/minibus was 9.0, and motorcycle collision was 4.0.</li> <li>6. Soft tissue injury was the most common maxillofacial injury 50% (23) and head injury was the commonest concomitant injury 66.7% (12) observed.</li> </ol> |

| <b>Authors-<br/>Year of<br/>Publication</b> | <b>Study location,<br/>study setting and<br/>study design,<br/>sampling method</b>                                                | <b>Severity<br/>scale</b> | <b>Participants<br/>characteristics</b><br>(type of RTIs;<br>sample size; sex<br>and distribution)             | <b>Salient features</b>                                                                                                                                                                                                                                                                                                                                                                                                                                                                                                                                                                                                                                                                                                                                                                                                                                                                                                                                                                                                                                                                                                                      |
|---------------------------------------------|-----------------------------------------------------------------------------------------------------------------------------------|---------------------------|----------------------------------------------------------------------------------------------------------------|----------------------------------------------------------------------------------------------------------------------------------------------------------------------------------------------------------------------------------------------------------------------------------------------------------------------------------------------------------------------------------------------------------------------------------------------------------------------------------------------------------------------------------------------------------------------------------------------------------------------------------------------------------------------------------------------------------------------------------------------------------------------------------------------------------------------------------------------------------------------------------------------------------------------------------------------------------------------------------------------------------------------------------------------------------------------------------------------------------------------------------------------|
| <b>NieJin et al-<br/>2010</b>               | China;<br>population-based<br>cross-sectional<br>study                                                                            | AIS                       | Crashes with car<br>and mini vans (79<br>sedans; 31<br>minivans)<br><br>Sample size: 110<br><br>All age groups | <ol style="list-style-type: none"> <li>1. Severe injuries (AIS 3+) due to crash with sedans were 35% and due to minivans were 50.5%.</li> <li>2. Minivan poses a greater risk to the pedestrian than sedan at the same impact speed.</li> <li>3. A significant correlation between the impact speed and severity of pedestrian injuries was documented. There is a significant relationship between pedestrian head injuries (AIS 3+) and injury parameters (head injury cases, head linear acceleration, head angle acceleration, angle velocity).</li> </ol>                                                                                                                                                                                                                                                                                                                                                                                                                                                                                                                                                                               |
| <b>Solagberu<br/>et al-2014</b>             | Ikeja,<br>Nigeria:<br>population-based<br>cross-sectional<br>study, prospective<br>recruitment of all<br>eligible<br>participants | GCS                       | All RTIs<br><br>Sample size: 226<br>(males - 114 and<br>females - 112)<br><br>Children aged up-<br>to 15 years | <ol style="list-style-type: none"> <li>1. 18.5% (42) were aged 0-4 years, 40.3% (91) aged 5–9 years, and 41.1% (93) aged 10–15 years.</li> <li>2. They had collision with car (36.7%, 83), motorcycles (33.6%, 76), buses (18.1%, 41), others (6.6%, 15), and 11 undetermined vehicles.</li> <li>3. Crossing the road was a major cause responsible for 74.3% (168) injuries, followed by hit at the bus stop 8.4% (19), walking along with the pavement 9.7% (22), and standing in front of house/shop 7.5% (17).</li> <li>4. Anatomical regions injured were head (42.9%), lower limbs (35.4%) and upper limb injury 9.7% (22).</li> <li>5. Fatality risks were truck collisions (OR 5.97, 95% CI 1.01-34.98), female child (OR 4.25, 95% CI 1.36-13.24), head injury (OR 4.18, 95% CI 1.45-12.05) and age up to 4 years (OR 3.7, 95% CI 1.38-9.88).</li> <li>6. According to GCS, 37% (40) subjects were mild, 30.5% (33) moderate, and 32.4% (35) were severe head injuries (among total 108 head injuries). Among which crossing the road produced 75%, 81%, and 85% mild, moderate, and severe head injuries, respectively.</li> </ol> |

| <b>Authors-<br/>Year of<br/>Publication</b> | <b>Study location,<br/>study setting and<br/>study design,<br/>sampling method</b>     | <b>Severity<br/>scale</b> | <b>Participants<br/>characteristics</b><br>(type of RTIs;<br>sample size; sex<br>and distribution)              | <b>Salient features</b>                                                                                                                                                                                                                                                                                                                                                                                                                                                                                                                                        |
|---------------------------------------------|----------------------------------------------------------------------------------------|---------------------------|-----------------------------------------------------------------------------------------------------------------|----------------------------------------------------------------------------------------------------------------------------------------------------------------------------------------------------------------------------------------------------------------------------------------------------------------------------------------------------------------------------------------------------------------------------------------------------------------------------------------------------------------------------------------------------------------|
| <b>NieJin et al-<br/>2010</b>               | China;<br>population-based<br>cross-sectional<br>study                                 | AIS                       | Crashes with car<br>and mini vans (79<br>sedans; 31<br>minivans)<br><br>Sample size: 110<br><br>All age groups  | <ol style="list-style-type: none"> <li>1. Severe injuries (AIS 3+) due to crash with sedans were 35% and due to minivans were 50.5%.</li> <li>2. Minivan poses a greater risk to the pedestrian than sedan at the same impact speed.</li> <li>3. A significant correlation between the impact speed and severity of pedestrian injuries was documented. There is a significant relationship between pedestrian head injuries (AIS 3+) and injury parameters (head injury cases, head linear acceleration, head angle acceleration, angle velocity).</li> </ol> |
| <b>Tokdemir<br/>et al-2009</b>              | Firat, Turkey:<br>hospital-based,<br>secondary data<br>analysis of<br>hospital records | GCS                       | RTIs involving<br>head injuries<br><br>Sample size: 233<br>(males - 163,<br>females - 70)<br><br>All age groups | <ol style="list-style-type: none"> <li>1. The pediatric (<math>\leq 16</math> years: 65.4%) and elderly (<math>\geq 65</math> years: 64.7%) groups were frequently involved as pedestrians in motor vehicle accidents; adults 17–64 years of age were involved as pedestrians at a lower rate (25.4%, <math>p &lt; 0.001</math>).</li> <li>2. According to GCS, 59.7 % (139) subjects were mild, 15.9 % (37) moderate, and 24.5 % (57) were severe head injuries.</li> <li>3. Mortality rate among them was 18.3% (43).</li> </ol>                             |

# If age not given, we considered all age groups.
