# Supplementary material for: Pattern of Severity of Road Traffic Injuries Among Pedestrians in Low- and Middle-Income Countries: A Systematic Review
Source: bioRxiv or medRxiv preprint supplement (doi:10.1101/2021.02.13.21251689), 2021-02-16
Supplement: Supplementary file [file media-7.pdf]

**Additional file - 7: Quality Appraisal of shortlisted studies with Newcastle-Ottawa Scale**

| <b>Authors-<br/>Year of<br/>Publication</b>                                                                                                                             | <b>Representativeness<br/>of the sample</b> | <b>Sample<br/>size</b> | <b>Non-<br/>respondents</b> | <b>Ascertainment<br/>of the<br/>exposure</b> | <b>Comparability</b> | <b>Assessment<br/>of the<br/>outcome</b> | <b>Statistical<br/>test</b> | <b>Total</b> |
|-------------------------------------------------------------------------------------------------------------------------------------------------------------------------|---------------------------------------------|------------------------|-----------------------------|----------------------------------------------|----------------------|------------------------------------------|-----------------------------|--------------|
| <b>Aladelusi<br/>et al -2014</b>                                                                                                                                        | 0                                           | 0                      | 0                           | 0                                            | 2                    | 2                                        | 0                           | 4            |
| <b>NieJin et<br/>al-2010</b>                                                                                                                                            | 0                                           | 0                      | 0                           | 2                                            | 1                    | 2                                        | 1                           | 6            |
| <b>Solagberu<br/>et al-2014</b>                                                                                                                                         | 0                                           | 0                      | 0                           | 0                                            | 1 <sup>#</sup>       | 2                                        | 1                           | 4            |
| <b>Tokdemir<br/>et al-2009</b>                                                                                                                                          | 0                                           | 0                      | NA*                         | 2                                            | 1 <sup>+</sup>       | 2                                        | 1                           | 6            |
| <b>Zhao et al-<br/>2013</b>                                                                                                                                             | 0                                           | 0                      | 0                           | 1                                            | 2                    | 2                                        | 1                           | 6            |
| <i>*NA- Not applicable due to limitation (secondary data), <sup>#</sup>Children up to 15 years were included, <sup>+</sup>Adolescence above 16 years were selected.</i> |                                             |                        |                             |                                              |                      |                                          |                             |              |
